# Supplementary material for: Pearl millet genome sequence provides a resource to improve agronomic traits in arid environments
Source: PubMed Central journal article supplement (PMC6871012; doi:10.1038/nbt.3943), 2017-09-18
Supplement: 41587_2017_BFnbt3943_MOESM49_ESM.pdf [file 41587_2017_BFnbt3943_MOESM49_ESM.pdf]

## Supplementary Tables

**Supplementary Table 1. Summary of whole genome shotgun sequence used for genome assembly**

| Library insert size (bp) | Read length (bp)* | Raw data        |                    | Filtered data   |                    |
|--------------------------|-------------------|-----------------|--------------------|-----------------|--------------------|
|                          |                   | Total data (Gb) | Sequence depth (X) | Total data (Gb) | Sequence depth (X) |
| 170                      | 100PE             | 86.60           | 49.28              | 78.64           | 44.75              |
| 250                      | 150PE             | 88.43           | 50.32              | 63.07           | 35.89              |
| 500                      | 90PE              | 58.32           | 33.19              | 50.63           | 28.81              |
| 800                      | 100PE             | 56.81           | 32.32              | 47.43           | 26.99              |
| 2,000                    | 49PE              | 83.06           | 47.26              | 37.22           | 21.18              |
| 5,000                    | 49PE              | 73.95           | 42.08              | 22.21           | 12.64              |
| 10,000                   | 49PE              | 35.32           | 20.10              | 7.26            | 4.13               |
| 20,000                   | 49PE              | 21.18           | 12.15              | 2.10            | 1.19               |
| 40,000                   | 49PE              | 16.52           | 9.40               | 3.42            | 1.95               |
| <b>Total</b>             |                   | <b>520.19</b>   | <b>296.00</b>      | <b>311.97</b>   | <b>177.52</b>      |

\*PE= paired end

**Supplementary Table 2. Statistics of bacterial artificial chromosome (BAC) sequencing**

| <b>Library insert size (bp)*</b> | <b>Number of BACs</b> | <b>Total data (Gb)</b> | <b>Raw mean depth (X)/ BAC</b> | <b>Clean mean depth (X)/ BAC</b> |
|----------------------------------|-----------------------|------------------------|--------------------------------|----------------------------------|
| 500                              | 100,608               | 971.51                 | 80.47                          | 60.68                            |

\*The average size of BAC clones is 120 kb

**Supplementary Table 3. Statistics of the final genome assembly**

|                               | <b>Contig</b>   |                | <b>Scaffold (<math>\geq 1</math> kb)</b> |               |
|-------------------------------|-----------------|----------------|------------------------------------------|---------------|
|                               | Size            | Number         | Size                                     | Number        |
| N90                           | 3.99 kb         | 95,122         | 182.47 kb                                | 2,261         |
| N80                           | 7.26 kb         | 66,462         | 359.87 kb                                | 1,572         |
| N70                           | 10.1 kb         | 48,105         | 529.31 kb                                | 1,157         |
| N60                           | 13.73 kb        | 34,700         | 695.61 kb                                | 857           |
| <b>N50</b>                    | <b>18.18 kb</b> | <b>175,708</b> | <b>884.95 kb</b>                         | <b>25,241</b> |
| Longest                       | 282.9 kb        | -              | 4.82 Mb                                  | -             |
| Total size                    | 1.58 Gb         | -              | <b>1.79 Gb</b>                           | -             |
| Total number ( $\geq 100$ bp) | 208,873         |                | -                                        | 57,931        |
| Total number ( $\geq 2$ kb)   | 121,670         |                | -                                        | 10,605        |

**Supplementary Table 4. Genome sequence assembly organized in chromosome-level pseudomolecules**

| <b>Pseudomolecule name</b> | <b>Number of scaffolds in pseudomolecule</b> | <b>Pseudomolecule size (bp)</b> |
|----------------------------|----------------------------------------------|---------------------------------|
| Pg1                        | 1138                                         | 275,469,374                     |
| Pg2                        | 815                                          | 243,054,348                     |
| Pg3                        | 963                                          | 300,907,625                     |
| Pg4                        | 809                                          | 191,830,058                     |
| Pg5                        | 699                                          | 158,694,342                     |
| Pg6                        | 894                                          | 240,570,548                     |
| Pg7                        | 561                                          | 154,011,256                     |
| <b>Total</b>               | <b>5,879</b>                                 | <b>1,564,537,551</b>            |

**Supplementary Table 5. Summary of whole genome GC content and expanded gene families.**

| <b>Species</b> | <b>GC% (whole CDS)</b> | <b>GC% (expanded families)</b> |
|----------------|------------------------|--------------------------------|
| Pearl millet   | 54.76                  | 53.14                          |
| Foxtail millet | 54.93                  | 53.91                          |
| Sorghum        | 55.17                  | 53.93                          |
| Barley         | 54.54                  | 53.57                          |
| Rice           | 55.32                  | 52.91                          |

**Supplementary Table 6. Evaluation of completeness of the genome assembly using the core eukaryotic gene mapping approach (CEGMA)**

| <b>Parameter*</b>                                | <b>Number</b> | <b>Percent (%)</b> |
|--------------------------------------------------|---------------|--------------------|
| Total KOGs                                       | 450           |                    |
| KOGs aligning to single genes                    | 437           | 97.11              |
| KOGs aligning to several genes      Overlap >0.5 | 5             | 1.11               |
| KOGs without aligned genes                       | 8             | 1.78               |

\*KOGs=Eukaryotic orthologous gene sequences

We found 97.11% of the eukaryotic orthologous gene sequences and 5 KOGs mapping to two or more genes in our assembly, i.e. 1.11% of the KOG genes. Manual visualization of these 5 genes show split into 10 genes in our assembly. Consequently we could estimate the percentage of the gene model split in our assembly to 2.3% i.e. ten genes out of 437+5 are split.

**Supplementary Table 7. Summary of Class I transposable elements in the current assembly**

| <b>Category</b>         | <b>Percent in the assembly (%)</b> |
|-------------------------|------------------------------------|
| Class I                 |                                    |
| LTR                     | 60.0                               |
| Copia                   | 22.2                               |
| Gypsy                   | 28.8                               |
| Unclassified LTR Retros | 9.0                                |
| LINE                    | 0.11                               |
| SINE                    | 0.004                              |

**Supplementary Table 8. Comparison of different pearl millet transcriptome assemblies**

| Feature*                   | Transcriptome assemblies                    |                                         |                                              |                         |
|----------------------------|---------------------------------------------|-----------------------------------------|----------------------------------------------|-------------------------|
|                            | Comprehensive (this study)                  | Zeng et al. <sup>15</sup>               | Rajaram et al. <sup>16</sup>                 | This study <sup>‡</sup> |
| Sequencing platform        | Mixed                                       | 454 GS FLX                              | 454 GS FLX                                   | PacBio                  |
| Program used for assembly  | CAP3                                        | MIRA                                    | PLANTTA/TGICL                                | NA                      |
| Total number of TACs*      | 69,398 (15,521 contigs + 53,877 singletons) | 26,576 (26,498 contigs + 78 singletons) | 112,864 (34,270 contigs + 78,594 singletons) | 50,313                  |
| Total number of bases (bp) | 43,011,379                                  | 6,832,261                               | 26,843,578                                   | 36,479,993              |
| Average contig length (bp) | 591                                         | 257                                     | 238                                          | 725                     |
| N50 (bp)                   | 1014                                        | 293                                     | 238                                          | 1142                    |
| Largest contig (bp)        | 15,300                                      | 2770                                    | 2571                                         | 15,292                  |
| Shortest contig (bp)       | 200                                         | 40                                      | 100                                          | 100                     |

\*TACs- transcriptome assembled contigs

<sup>‡</sup>The transcriptome data can be accessed at <https://sites.google.com/site/africropproject/data>



**Supplementary Table 9. Prediction of protein-coding genes in pearl millet**

| Gene set       |                | Number | Average transcript length (bp) | Average CDS length (bp) | Average number of exons per gene | Average exon length (bp) | Average intron length (bp) |
|----------------|----------------|--------|--------------------------------|-------------------------|----------------------------------|--------------------------|----------------------------|
| <i>De novo</i> | AUGUSTUS       | 53,274 | 2133.76                        | 712.37                  | 3.11                             | 229.34                   | 674.87                     |
|                | FGENESH        | 53,689 | 3107.46                        | 944.47                  | 4.31                             | 218.99                   | 652.90                     |
| Homolog        | Rice           | 26,187 | 2484.78                        | 1139.00                 | 4.85                             | 234.64                   | 349.17                     |
|                | Foxtail millet | 34,417 | 2307.77                        | 1103.26                 | 4.58                             | 241.05                   | 336.75                     |
|                | Sorghum        | 28,353 | 2481.16                        | 1136.16                 | 4.79                             | 237.18                   | 354.86                     |
|                | Maize          | 33,208 | 2309.73                        | 1051.49                 | 4.67                             | 225.13                   | 342.79                     |
| PgTA           |                | 52,758 | 3945.35                        | 687.59                  | 2.84                             | 242.22                   | 1771.79                    |
| GLEAN          |                | 38,579 | 2420.19                        | 1014.71                 | 4.09                             | 248.06                   | 454.77                     |

PgTA= *Pennisetum glaucum* transcriptome assembly. For predictions with Augustus (Version 2.5.5) and FGENESH (Version 1.3), parameters trained on maize and monocot plants were used, respectively, with other parameters setting as default. For homolog-based prediction, proteins from four monocot species, *O. sativa* (JGI9.0), *S. italica* (<http://foxtailmillet.genomics.org.cn/>), *S. bicolor* (JGI7.0) and *Z. mays* (JGI9.0) were aligned to the pearl millet genome with BLAT to find homologous regions. GeneWise (version 2.2) was then used to generate spliced alignments and the gene models. PgTA sequences were matched against the genome with BLAT with identity  $\geq 0.98$ , coverage  $\leq 0.98$  to find coding region with high confidence. Gene models predicted from the three approaches mentioned above were integrated using GLEAN (version) to produce the final consensus gene set.

**Supplementary Table 10. Functional annotation of predicted genes in pearl millet**

|                        | <b>Number</b> | <b>Percent (%)</b> |
|------------------------|---------------|--------------------|
| Total                  | 38,579        |                    |
| Functionally annotated | 27,893        | 72.30              |
| SwissProt              | 21,455        | 55.61              |
| InterPro               | 25,281        | 65.53              |
| KEGG                   | 21,526        | 55.80              |
| Unannotated            | 10,686        | 27.70              |

Versions: KEGG81, UniProt rls201506 and InterProScan 5

**Supplementary Table 11. Orthology of pearl millet proteins with the proteins of Arabidopsis, banana, barley, Brachypodium, foxtail millet, maize, rice, sorghum, bread wheat and soybean**

| Species                        | Pearl millet     |                | Aligned species  |                |
|--------------------------------|------------------|----------------|------------------|----------------|
|                                | Matched proteins | Percentage (%) | Matched proteins | Percentage (%) |
| Pearl millet vs Arabidopsis    | 23,874           | 61.88          | 22,005           | 82.61          |
| Pearl millet vs banana         | 24,356           | 63.13          | 29,610           | 81.06          |
| Pearl millet vs barley         | 26,932           | 69.81          | 32,526           | 40.98          |
| Pearl millet vs Brachypodium   | 27,106           | 70.26          | 23,951           | 90.68          |
| Pearl millet vs foxtail millet | 28,609           | 74.16          | 28,232           | 84.87          |
| Pearl millet vs maize          | 27,355           | 70.91          | 31,271           | 78.55          |
| Pearl millet vs rice           | 27,372           | 70.95          | 27,415           | 70.40          |
| Pearl millet vs sorghum        | 27,726           | 71.87          | 25,716           | 94.69          |
| Pearl millet vs soybean        | 24,005           | 62.22          | 38,877           | 90.71          |
| Pearl millet vs bread wheat    | 26,197           | 67.90          | 27,268           | 78.18          |

The alignment was performed by BlastP with an e-value threshold of 1.0e-05. The values in “Matched proteins” show the number of proteins with a match

**Supplementary Table 12. Orthology analysis at the protein level of predicted genes in pearl millet with those annotated in Arabidopsis, banana, barley, Brachypodium, foxtail millet, maize, rice, sorghum, bread wheat and soybean**

| Species             | Total predicted genes | No. of genes in orthologous groups | No. of genes not in orthologous groups <sup>1</sup> | Total No. of orthologous groups <sup>2</sup> | Species-specific homolog groups <sup>3</sup> | Average No. of genes per group |
|---------------------|-----------------------|------------------------------------|-----------------------------------------------------|----------------------------------------------|----------------------------------------------|--------------------------------|
| <b>Pearl millet</b> | <b>38,579</b>         | <b>30,783</b>                      | <b>7,796</b>                                        | <b>17,949</b>                                | <b>800</b>                                   | <b>1.72</b>                    |
| Arabidopsis         | 26,637                | 22,845                             | 3,792                                               | 13,064                                       | 860                                          | 1.75                           |
| Brachypodium        | 26,413                | 23,335                             | 3,078                                               | 17,198                                       | 232                                          | 1.36                           |
| Banana              | 36,549                | 25,585                             | 10,964                                              | 12,759                                       | 709                                          | 2.01                           |
| Barley              | 79,379                | 33,628                             | 45,751                                              | 20,715                                       | 2,711                                        | 1.62                           |
| Foxtail millet      | 33,264                | 27,327                             | 5,937                                               | 19,156                                       | 204                                          | 1.43                           |
| Maize               | 39,810                | 30,851                             | 8,959                                               | 18,509                                       | 1,355                                        | 1.67                           |
| Rice                | 38,942                | 27,913                             | 11,029                                              | 18,627                                       | 1,103                                        | 1.50                           |
| Sorghum             | 27,159                | 24,466                             | 2,693                                               | 18,339                                       | 83                                           | 1.33                           |
| Soybean             | 42,859                | 38,648                             | 4,211                                               | 14,036                                       | 1,508                                        | 2.75                           |
| Bread wheat         | 34,879                | 25,563                             | 9,316                                               | 16,858                                       | 838                                          | 1.52                           |

<sup>1</sup>Predicted genes that were not organized into groups using OrthoMCL. We suggest that many such genes are mis-annotated, though we cannot rule out genes with unique domain arrangements that have undergone lineage specific expansion. <sup>2</sup>Orthologous groups containing at least one gene from the indicated species. <sup>3</sup>Groups containing putative paralogs from the indicated species, but lacking genes from other species. Such unassigned homologous groups may contain genes with ambiguous relationships among species, such as many of the NBS-LRR disease resistance genes that can evolve by processes such as non-allelic recombination and gene conversion.

**Supplementary Table 13. Summary of orthologous and paralogous genes in pearl millet relative to selected sequenced cereal, legume and dicot genomes**

| <i>Species</i>      | <b>Single-copy orthologs</b> | <b>Co-orthologs<sup>1</sup> (Multiple copy orthologs)</b> | <b>Unique paralogs</b> | <b>Other orthologs<sup>2</sup></b> | <b>Unclustered genes</b> |
|---------------------|------------------------------|-----------------------------------------------------------|------------------------|------------------------------------|--------------------------|
| <b>Pearl millet</b> | <b>5,232</b>                 | <b>5,205</b>                                              | <b>7,002</b>           | <b>13,344</b>                      | <b>7,796</b>             |
| Arabidopsis         | 4,609                        | 6,923                                                     | 3,338                  | 7,975                              | 3,792                    |
| Banana              | 3,578                        | 11,528                                                    | 1,874                  | 8,605                              | 10,964                   |
| Barley              | 4,603                        | 7,108                                                     | 7,164                  | 14,753                             | 45,751                   |
| Brachypodium        | 5,106                        | 5,355                                                     | 616                    | 12,258                             | 3,078                    |
| Foxtail millet      | 4,894                        | 6,168                                                     | 510                    | 15,755                             | 5,937                    |
| Maize               | 4,058                        | 8,554                                                     | 4,025                  | 14,214                             | 8,959                    |
| Rice                | 5,061                        | 5,707                                                     | 3,335                  | 13,810                             | 11,029                   |
| Sorghum             | 4,995                        | 5,758                                                     | 216                    | 13,497                             | 2,693                    |
| Soybean             | 1,326                        | 19,031                                                    | 4,489                  | 13,802                             | 4,211                    |
| Bread wheat         | 5,435                        | 4,905                                                     | 2,499                  | 12,724                             | 9,316                    |

<sup>1</sup>Co-orthologous genes, also known as “inparalogs”, are derived from duplication in the indicated genome. <sup>2</sup>Other orthologs represent gene duplication events internal to the overall set, but basal to more than two of the compared species.

**Supplementary Table 14. Non-coding RNA genes in the pearl millet genome**

| Type     | Number of copies | Average length (bp) | Total length (bp) | % of genome |
|----------|------------------|---------------------|-------------------|-------------|
| miRNA    | 183              | 125.51              | 22,968            | 0.000013    |
| tRNA     | 909              | 75.86               | 68,961            | 0.000038    |
| rRNA     | 235              | 265.70              | 62,440            | 0.000034    |
| 18S      | 64               | 651.33              | 41,685            | 0.000023    |
| 28S      | 78               | 133.31              | 10,398            | 0.000006    |
| 5.8S     | 26               | 149.50              | 3,887             | 0.000002    |
| 5S       | 67               | 96.57               | 6,470             | 0.000004    |
| snRNA    | 752              | 119.04              | 89,519            | 0.000049    |
| CD-box   | 579              | 110.03              | 63,705            | 0.000035    |
| HACA-box | 28               | 121.07              | 3,390             | 0.000002    |
| splicing | 145              | 154.65              | 22,424            | 0.000012    |

**Supplementary Table 15. Summary of genes expanded during pearl millet evolution**

*It has been uploaded as an excel spread sheet*

**Supplementary Table 16. Different classes of nucleotide binding site (NBS) encoding genes present in pearl millet and other monocot species**

|                | <b>Pearl millet</b> | <b>Foxtail millet</b> | <b>Sorghum</b>    | <b>Rice</b>       |
|----------------|---------------------|-----------------------|-------------------|-------------------|
|                | <b>Number (%)</b>   | <b>Number (%)</b>     | <b>Number (%)</b> | <b>Number (%)</b> |
| LRR-NBS-LRR    | 1 (0.26)            | 1 (0.22)              | 0                 | 1 (0.19)          |
| NBS-only       | 154 (40.74)         | 126 (27.94)           | 99 (34.49)        | 192 (36.02)       |
| NBS-LRR        | 162 (42.86)         | 223 (49.46)           | 145 (50.52)       | 267 (50.09)       |
| NBS (X2,3)     | 39 (10.32)          | 51 (11.31)            | 23 (8.01)         | 44 (8.26)         |
| NBS (X2,3)-LRR | 22 (5.82)           | 50 (11.09)            | 20 (6.98)         | 29 (5.44)         |
| NBS-total      | <b>378</b>          | 45                    | 287               | 533               |
| TIR-only       | 2                   | 2                     | 2                 | 1                 |



**Supplementary Table 17. Distribution of nucleotide binding site (NBS) encoding genes on the seven pseudomolecules of pearl millet**

| <b>Pseudomolecule name</b> | <b>NBS number</b> | <b>NBS (%)</b> | <b>Genes on pseudomolecule</b> | <b>NBS on each pseudomolecule (%)</b> |
|----------------------------|-------------------|----------------|--------------------------------|---------------------------------------|
| Pg1                        | 97                | 25.66          | 5,925                          | 1.64                                  |
| Pg2                        | 33                | 8.73           | 6,039                          | 0.55                                  |
| Pg3                        | 25                | 6.61           | 5,979                          | 0.42                                  |
| Pg4                        | 99                | 26.19          | 3,992                          | 2.48                                  |
| Pg5                        | 30                | 7.94           | 4,669                          | 0.64                                  |
| Pg6                        | 23                | 6.08           | 5,113                          | 0.45                                  |
| Pg7                        | 53                | 14.03          | 4,074                          | 1.30                                  |
| Unanchored scaffolds       | 18                | 4.76           | 2,788                          | 0.65                                  |
| <b>Total</b>               | <b>378</b>        | <b>100</b>     | <b>38,579</b>                  |                                       |

**Supplementary Table 18. Summary of tandem/closely located groups of NBS genes on seven pseudomolecules of pearl millet**

| <b>Pseudo-molecule</b> | <b>Total NBS gene</b> | <b>Tandem (1)*</b> | <b>Closely located group(5)*</b> | <b>Closely located group(10)*</b> |
|------------------------|-----------------------|--------------------|----------------------------------|-----------------------------------|
| Pg1                    | 97                    | 11X2**, 1X3, 2X4   | 8X2, 7X3, 3X4, 3X5, 1X6          | 6X2, 3X3, 3X4, 6X5, 2X6           |
| Pg2                    | 33                    | 2X2                | 4X2, 1X3                         | 5X2, 1X3                          |
| Pg3                    | 25                    | 2X2, 1X3, 1X4      | 2X2, 1X3, 2X4                    | 2X2, 1X3, 1X4, 1X5                |
| Pg4                    | 99                    | 11X2, 2X3, 3X4     | 9X2, 3X3, 6X4, 1X5               | 12X2, 3X3, 6X4, 2X6               |
| Pg5                    | 30                    | 2X2, 1X5           | 3X2, 1X4, 1X6                    | 3X2, 1X4, 1X7                     |
| Pg6                    | 23                    | 2X3                | 2X2, 1X3, 1X4                    | 2X2, 1X3, 1X4                     |
| Pg7                    | 53                    | 8X2, 1X3           | 6X2, 2X3, 1X4                    | 7X2, 1X3, 2X4                     |

\*Three types of tandem/closely located NBS gene groups were defined and identified: (a) Tandem (1) - are groups of NBS genes that are strictly adjacent with each other; (b) Tandem (5) -Closely located group of NBS genes that are within 5 non-NBS genes and (c) Tandem (10) -Closely located group of NBS genes that are within 10 non-NBS genes

\*\*pattern of group: e.g. 11X2 means there are 11 groups of tandem (1) with size = 2 genes in Pg1

Specifically, seven closely located tandem (10) group were found within the first 10 Mb region of Pg1(two 4-gene groups, four 5-gene groups and one 6-gene group), while on Pg4 there were five closely located tandem (10) group in the first 20 Mb region (three 2-gene groups and two 4-gene groups)

**Supplementary Table 19. Summary of data generated on the PMiGAP lines using whole genome resequencing**  
*It has been uploaded as an excel spread sheet*

**Supplementary Table 20. Data generated on 38 inbred parents of different mapping populations using whole genome resequencing**

*It has been uploaded as an excel spread sheet.*

**Supplementary Table 21. Data generated for B- and R-lines of pearl millet using RAD-Seq approach**

*It has been uploaded as an excel spread sheet.*

**Supplementary Table 22. Summary of whole genome resequencing data generated on 31 wild pearl millet accessions**

| <b>Sample ID</b> | <b>Raw reads</b> | <b>Raw bases (bp)</b> | <b>Clean reads</b> | <b>Clean bases (bp)</b> | <b>Depth (X)</b> |
|------------------|------------------|-----------------------|--------------------|-------------------------|------------------|
| PE00838          | 20,991,644       | 4,072,378,936         | 19,327,391         | 3,749,513,854           | 2.06             |
| PE01458          | 21,645,848       | 4,199,294,512         | 19,558,592         | 3,794,366,848           | 2.09             |
| PE05720          | 26,744,557       | 5,188,444,058         | 24,616,203         | 4,775,543,382           | 2.63             |
| PE05722          | 17,071,580       | 3,311,886,520         | 15,789,265         | 3,063,117,410           | 1.69             |
| PE05724          | 21,989,652       | 4,265,992,488         | 19,807,750         | 3,842,703,500           | 2.12             |
| PE08084          | 18,266,209       | 3,543,644,546         | 17,052,862         | 3,308,255,228           | 1.82             |
| PE08094          | 15,059,662       | 2,921,574,428         | 13,715,527         | 2,660,812,238           | 1.46             |
| PE08106          | 20,341,921       | 3,946,332,674         | 18,563,412         | 3,601,301,928           | 1.98             |
| PE08127          | 19,312,626       | 3,746,649,444         | 17,683,366         | 3,430,573,004           | 1.89             |
| PE08136          | 15,116,320       | 2,932,566,080         | 14,147,046         | 2,744,526,924           | 1.51             |
| PE08146          | 24,855,946       | 4,822,053,524         | 23,064,451         | 4,474,503,494           | 2.46             |
| PE08155          | 11,762,336       | 2,281,893,184         | 10,962,258         | 2,126,678,052           | 1.17             |
| PE08165          | 30,798,488       | 5,974,906,672         | 27,840,516         | 5,401,060,104           | 2.97             |
| PE08171          | 25,929,183       | 5,030,261,502         | 23,939,935         | 4,644,347,390           | 2.56             |
| PE08470          | 41,205,101       | 7,993,789,594         | 37,285,934         | 7,233,471,196           | 3.98             |
| PE08473          | 14,886,036       | 2,887,890,984         | 13,767,576         | 2,670,909,744           | 1.47             |
| PE08492a         | 25,492,041       | 4,945,455,954         | 23,127,743         | 4,486,782,142           | 2.47             |
| PE08487          | 15,807,544       | 3,066,663,536         | 14,378,064         | 2,789,344,416           | 1.54             |
| PE08492          | 18,626,253       | 3,613,493,082         | 17,248,236         | 3,346,157,784           | 1.84             |
| PE08498          | 18,965,000       | 3,679,210,000         | 17,275,954         | 3,351,535,076           | 1.85             |
| PE08503          | 16,846,817       | 3,268,282,498         | 15,216,794         | 2,952,058,036           | 1.63             |
| PE08721          | 24,132,585       | 4,681,721,490         | 22,191,406         | 4,305,132,764           | 2.37             |
| PE08726          | 20,379,802       | 3,953,681,588         | 18,755,512         | 3,638,569,328           | 2.00             |
| PE08727          | 26,464,489       | 5,134,110,866         | 24,312,948         | 4,716,711,912           | 2.60             |
| PE08730          | 21,223,323       | 4,117,324,662         | 19,458,645         | 3,774,977,130           | 2.08             |
| PE08731          | 19,248,865       | 3,734,279,810         | 17,746,151         | 3,442,753,294           | 1.90             |
| PE08732          | 22,697,013       | 4,403,220,522         | 20,958,165         | 4,065,884,010           | 2.24             |
| PE08734          | 25,386,251       | 4,924,932,694         | 23,018,094         | 4,465,510,236           | 2.46             |
| PE08736          | 20,799,867       | 4,035,174,198         | 19,193,426         | 3,723,524,644           | 2.05             |
| PE08743          | 9,334,258        | 1,810,846,052         | 8,607,858          | 1,669,924,452           | 0.92             |
| PE08744          | 31,308,056       | 6,073,762,864         | 28,511,787         | 5,531,286,678           | 3.05             |

**Supplementary Table 23. Summary of SSR motifs identified, primers designed and their genome coordinates**

*It has been uploaded as an excel spread sheet.*

**Supplementary Table 24. Summary statistics on the simple sequence repeats identified, their distribution and primer design based on genome assembly**

---

|                                                                                          |               |
|------------------------------------------------------------------------------------------|---------------|
| Total size of examined sequences (bp)                                                    | 1,816,969,981 |
| Total number of identified SSRs                                                          | 88,256        |
| Total number of SSRs present in compound formation                                       | 9,042         |
| Number of scaffolds examined                                                             | 52,052        |
| Number of SSR containing scaffolds                                                       | 3,411         |
| Number of scaffolds containing more than 1 SSR                                           | 840           |
| <i>Distribution to different repeat type classes (excluding mono-nucleotide repeats)</i> |               |
| Number of di-nucleotide repeats                                                          | 39,394        |
| Number of tri-nucleotide repeats                                                         | 38,987        |
| Number of tetra-nucleotide repeats                                                       | 7,799         |
| Number of penta-nucleotide repeats                                                       | 1,347         |
| Number of hexa-nucleotide repeats                                                        | 729           |
| <i>Primer pairs for SSRs</i>                                                             |               |
| Scaffolds used to design primer pairs                                                    | 1,729         |
| Total numbers of primer pairs designed                                                   | 74,891        |

---

\*Minimum of six units for di-, and five units for tri-, tetra-, penta- and hexa-nucleotide repeats were required for defining simple SSRs. Primers were designed for identified SSRs using the software Primer3 v2.3.4 with the following criteria: (i) primer length ranging from 18 bp to 24 bp with an optimum of 20 bp (ii) product size ranging from 100 bp to 350 bp; (iii) melting temperature (T<sub>m</sub>) between 50–65 °C with 60 °C as optimum; (iv) GC % content in the range 40–60%.



**Supplementary Table 25. Distribution of SNPs in intra-genic and inter-genic regions across PMiGAP lines**

*It has been uploaded as an excel spread sheet.*

**Supplementary Table 26. Distribution of SNPs in intra-genic and inter-genic regions across parental lines of mapping populations**

*It has been uploaded as an excel spread sheet.*

**Supplementary Table 27. Distribution of SNPs in intra-genic and inter-genic regions across B- and R- lines**

*It has been uploaded as an excel spread sheet.*

**Supplementary Table 28. Distribution of SNPs and Indels across the seven pseudomolecules and unanchored scaffolds in the PMiGAP lines, parental lines of mapping populations and B- and R- lines of pearl millet**

| Pseudo-molecule | PMiGAP lines |             |           | Parental lines |             |           | B- and R- lines |             |         |
|-----------------|--------------|-------------|-----------|----------------|-------------|-----------|-----------------|-------------|---------|
|                 | SNPs         | SNP density | Indels    | SNPs           | SNP density | Indels    | SNPs            | SNP density | Indels  |
| Pg1             | 4,506,009    | 16,358      | 618,602   | 1,979,895      | 7,187       | 184,602   | 445,740         | 1,618       | 115,872 |
| Pg2             | 4,089,497    | 16,825      | 583,597   | 1,928,005      | 7,932       | 194,296   | 380,052         | 1,564       | 106,950 |
| Pg3             | 5,018,746    | 16,679      | 585,835   | 2,124,996      | 7,062       | 172,275   | 480,301         | 1,596       | 101,597 |
| Pg4             | 3,614,768    | 18,844      | 476,029   | 1,557,206      | 8,118       | 126,269   | 383,674         | 2,000       | 86,562  |
| Pg5             | 2,492,716    | 15,708      | 399,561   | 1,105,708      | 6,968       | 126,265   | 244,140         | 1,538       | 74,959  |
| Pg6             | 3,957,457    | 16,450      | 453,547   | 1,320,771      | 5,490       | 127,486   | 353,157         | 1,468       | 78,949  |
| Pg7             | 2,602,833    | 16,900      | 361,197   | 1,101,575      | 7,153       | 100,934   | 268,555         | 1,744       | 66,056  |
| Pg0             | 3,260,147    |             | 366,078   | 1,070,978      |             | 79,418    | 305,089         |             | 62,786  |
| Total           | 29,542,173   |             | 3,844,446 | 12,189,134     |             | 1,111,545 | 2,860,708       |             | 693,731 |

Pg0 indicates unanchored scaffolds

**Supplementary Table 29. Insertions and deletions identified in the PMiGAP lines**

*It has been uploaded as an excel spread sheet.*

**Supplementary Table 30. Insertions and deletions identified in the parental lines of mapping populations**

*It has been uploaded as an excel spread sheet.*

**Supplementary Table 31. Insertions and deletions identified in B- and R- lines**

*It has been uploaded as an excel spread sheet.*

**Supplementary Table 32. Summary of structural variations in the PMiGAP lines, parental lines of mapping populations and B and R-lines of pearl millet**

| <b>Germplasm</b> | <b>Type of variation*</b> | <b>Number of variants</b> | <b>Total length (kb)</b> | <b>Average length (kb)</b> |
|------------------|---------------------------|---------------------------|--------------------------|----------------------------|
| PMiGAP           | DEL                       | 150,731                   | 424,588.46               | 2.82                       |
|                  | INS                       | 257,256                   | 53,281.54                | 0.21                       |
|                  | INV                       | 2,139                     | 140,934.53               | 65.89                      |
|                  | ITX                       | 12,992                    | 158,904.77               | 12.23                      |
| Parental lines   | DEL                       | 75,822                    | 280,024.25               | 3.69                       |
|                  | INS                       | 29,673                    | 6,892.51                 | 0.23                       |
|                  | INV                       | 704                       | 58,457.37                | 83.04                      |
|                  | ITX                       | 5,032                     | 70,050.52                | 13.92                      |
| B- and R-lines   | DEL                       | 4,684                     | 33,532.59                | 7.16                       |
|                  | INS                       | 15,652                    | 3,080.10                 | 0.20                       |
|                  | INV                       | 176                       | 28,261.41                | 160.58                     |
|                  | ITX                       | 4,849                     | 19,782.18                | 4.08                       |

\*DEL, deletion; INS, insertion; INV, inversion; ITX, intra-chromosomal translocation



**Supplementary Table 33. Diversity levels in cultivated (pearl millet inbred germplasm association panel PMiGAP) and wild accessions of pearl millet**

| Pseudomolecule name | PMiGAP lines                |                               | Wild                        |                               | F <sub>ST</sub> |
|---------------------|-----------------------------|-------------------------------|-----------------------------|-------------------------------|-----------------|
|                     | Theta Pi<br>( $\theta\pi$ ) | Theta w<br>( $\theta\omega$ ) | Theta Pi<br>( $\theta\pi$ ) | Theta w<br>( $\theta\omega$ ) |                 |
| Pg1                 | 0.00229                     | 0.00283                       | 0.00347                     | 0.003346                      | 0.18602         |
| Pg2                 | 0.0026                      | 0.00287                       | 0.00345                     | 0.003371                      | 0.18249         |
| Pg3                 | 0.00241                     | 0.00288                       | 0.00355                     | 0.00336                       | 0.1829          |
| Pg4                 | 0.00274                     | 0.00316                       | 0.00383                     | 0.003599                      | 0.15983         |
| Pg5                 | 0.00231                     | 0.00271                       | 0.00343                     | 0.003313                      | 0.19348         |
| Pg6                 | 0.002                       | 0.00286                       | 0.00403                     | 0.003412                      | 0.31023         |
| Pg7                 | 0.00241                     | 0.00289                       | 0.00396                     | 0.003611                      | 0.22735         |
| Average             | 0.00238                     | 0.00289                       | 0.00366                     | 0.003417                      | 0.20567         |

$\theta\pi$  and  $\theta\omega$  are measures of nucleotide diversity; Fixation index (F<sub>ST</sub>) is a measure of population differentiation due to genetic structure

**Supplementary Table 34. Regions with loss of diversity and strong differentiation between wild and cultivated pearl millet**

*It has been uploaded as an excel spread sheet.*

**Supplementary Table 35. List of the genes found in the regions showing strong differentiation between wild and cultivated germplasm and diversity loss in the cultigen**

*It has been uploaded as an excel spread sheet.*

**Supplementary Table 36. Genome-wide marker-trait associations for grain and stover yield**

*It has been uploaded as an excel spread sheet.*

**Supplementary Table 37. Best 170 predicted hybrid combinations**

*It is provided as separate Excel file*

**Supplementary Table 38. Best 11 tested hybrid combinations**

*It is provided as separate Excel file*

**Supplementary Table 39. Pedigree details of B- and R-lines used in the study**

*It is provided as separate Excel file*

**Supplementary Table 40. Details of 345 Pearl Millet Inbred Germplasm Association Panel (PMiGAP) lines used in the study**

*It is provided as separate Excel file*



**Supplementary Table 41. Details of 38 parental lines of mapping populations of pearl millet used in the study**

*It is provided as separate Excel file*

**Supplementary Table 42. Passport data of 31 pearl millet wild species accessions**

| <b>Accession ID</b> | <b>Country</b> | <b>Year of sampling</b> | <b>Group*</b> |
|---------------------|----------------|-------------------------|---------------|
| PE05720             | Mali           | 1978                    | WA            |
| PE05722             | Mali           | 1978                    | WA            |
| PE05724             | Mali           | 1978                    | WA            |
| PE08487             | Mauritania     | 1987                    | WA            |
| PE08498             | Mauritania     | 1987                    | WA            |
| PE08492             | Mauritania     | 1987                    | WA            |
| PE08492a            | Mauritania     | 1987                    | WA            |
| PE08503             | Senegal        | 1987                    | WA            |
| PE01458             | Senegal        | 1976                    | WA            |
| PE08726             | NA             | NA                      | WA            |
| PE08743             | Soudan         | 1988                    | WB            |
| PE08744             | Soudan         | 1988                    | WB            |
| PE08727             | Chad           | 1988                    | WB            |
| PE08731             | Chad           | 1988                    | WB            |
| PE08732             | Chad           | 1988                    | WB            |
| PE08736             | Chad           | 1988                    | WB            |
| PE08721             | Chad           | 1988                    | WB            |
| PE08730             | Chad           | 1988                    | WB            |
| PE08734             | Chad           | 1988                    | WB            |
| PE08155             | Mali           | 1986                    | WC            |
| PE08473             | Mali           | 1987                    | WC            |
| PE08165             | Mali           | 1986                    | WC            |
| PE08171             | Mali           | 1986                    | WC            |
| PE08470             | Mali           | 1987                    | WC            |
| PE00838             | Niger          | 1975                    | WC            |
| PE08084             | Niger          | 1985                    | WC            |
| PE08136             | Niger          | 1985                    | WC            |
| PE08094             | Niger          | 1985                    | WC            |
| PE08106             | Niger          | 1985                    | WC            |
| PE08127             | Niger          | 1985                    | WC            |
| PE08146             | Niger          | 1985                    | WC            |

\*WA- Western part of Africa covering Senegal, Mauritania and West Mali; WB- Eastern Africa covering Chad and Sudan; WC- Western Central Africa covering East Mali and Niger
